# Supplementary material for: The photochemical ring opening reaction of chromene as seen by transient absorption and fluorescence spectroscopy
Source: Royal Society of Chemistry journal article supplement (doi:10.1039/c3pp50020a), 2013-03-27
Supplement: c3pp50020a_4.pdf [file c3pp50020a_4.pdf]

## Supporting information for the manuscript

### The photochemical ring opening reaction of chromene as seen by transient absorption and fluorescence spectroscopy

Teja T. Herzog<sup>1</sup>, Gerald Ryseck<sup>1,2</sup>, Evelyn Ploetz<sup>1,2,3</sup>, Thorben Cordes<sup>1,3\*</sup>

<sup>1</sup>Chair for Biomolecular Optics, Faculty of Physics, Ludwig-Maximilians-Universität München, Oettingenstr. 67, D-80538 München, Germany, and Munich Center for Integrated Protein Science (CIPSM)

<sup>2</sup>Femtosecond Spectroscopy, Institute for Physical Chemistry II, Heinrich-Heine-Universität Düsseldorf, Universitätsstr. 1, D-40225 Düsseldorf, Germany

<sup>3</sup>Molecular Microscopy Research Group & Single-molecule Biophysics, Zernike Institute for Advanced Materials, University of Groningen, Nijenborgh 4, 9747 AG Groningen, The Netherlands

\*corresponding author, fax: (+31) 50 363 9199, e-mail: [t.m.cordes@rug.nl](mailto:t.m.cordes@rug.nl)

#### Additional data

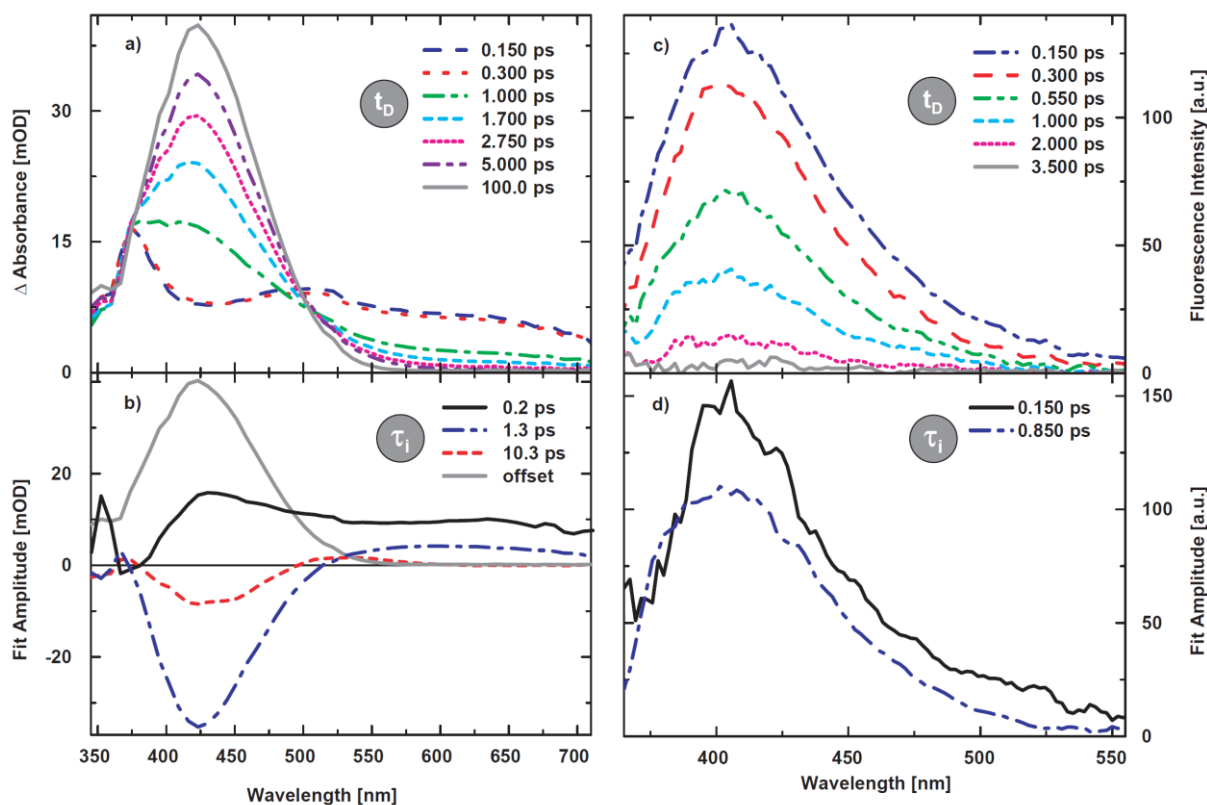

**Figure S1.** (a) Time evolution of the absorption spectra following 325 nm excitation of DPBC closed form in hexane. (b) DAS of the TA experiments resulting from a multi-exponential fit analysis with associated time constants  $\tau_i$ . (c) Time evolution of the emission spectra following 320 nm excitation of DPBC closed form in hexane. (d) DAS of the TFI experiments resulting from a multi-exponential fit analysis with associated time constants  $\tau_i$ .

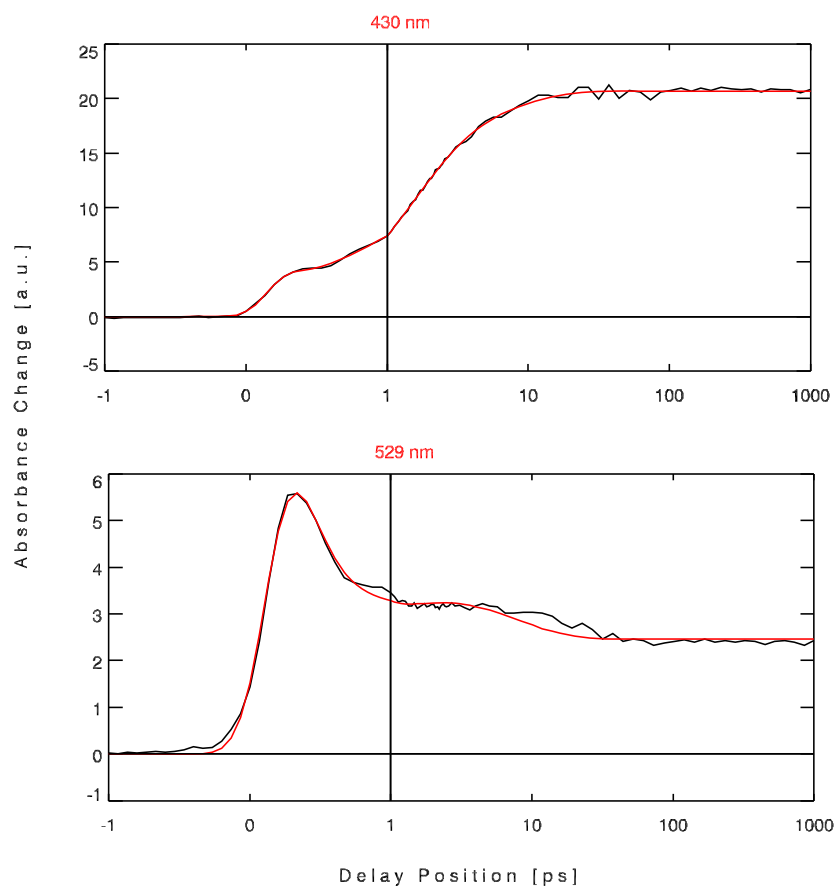

**Figure S2.** (a) Time evolution of the absorption spectra following 325 nm excitation of DPBC closed form in hexane. Absorbance changes over time are shown as experimental data and multi-exponential fits at different wavelength.

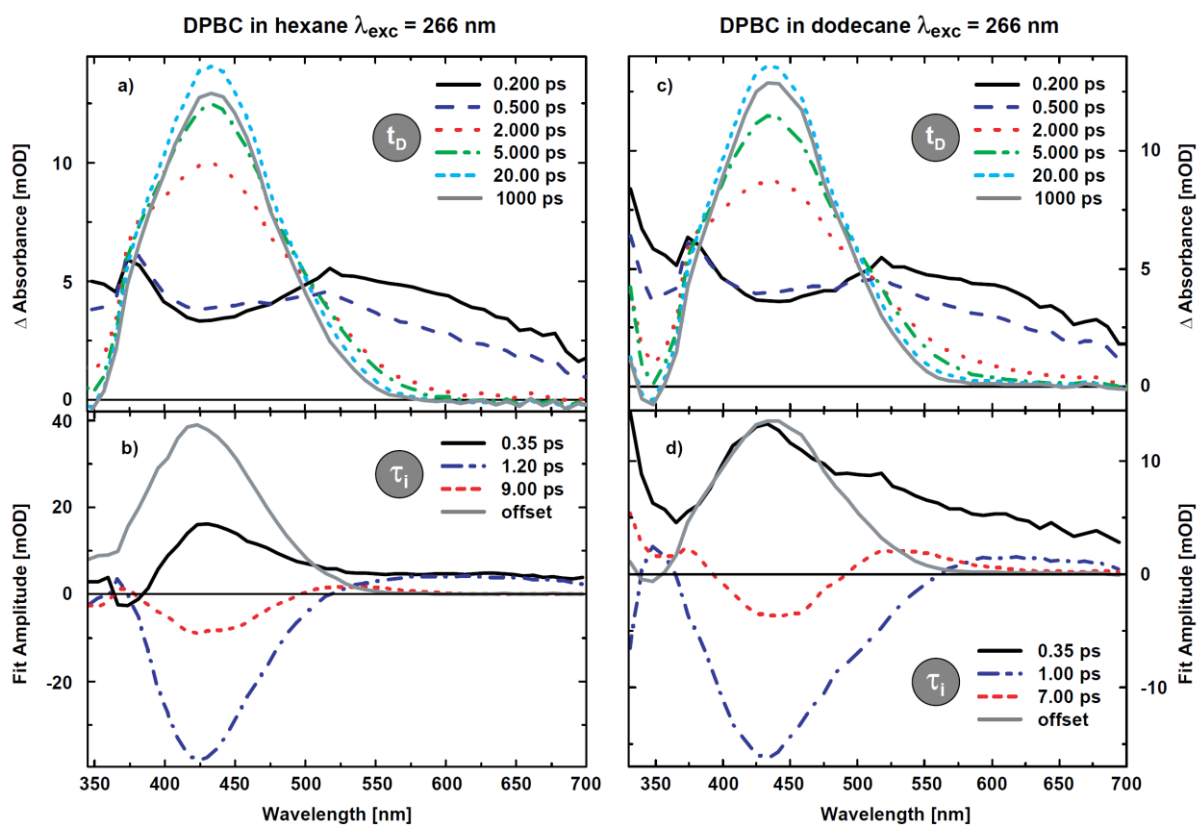

**Figure S3.** (a) Time evolution of the absorption spectra following 266 nm excitation of DPBC closed form in hexane. (b) DAS of the TA experiments resulting from a multi-exponential fit analysis with associated time constants  $\tau_i$ . (c) Time evolution of the emission spectra following 266 nm excitation of DPBC closed form in dodecane. (d) DAS of the TA experiments resulting from a multi-exponential fit analysis with associated time constants  $\tau_i$ .
