# Supplementary figures and images for: The photochemical ring opening reaction of chromene as seen by transient absorption and fluorescence spectroscopy
Source: Royal Society of Chemistry journal article supplement (doi:10.1039/c3pp50020a), 2013-03-27

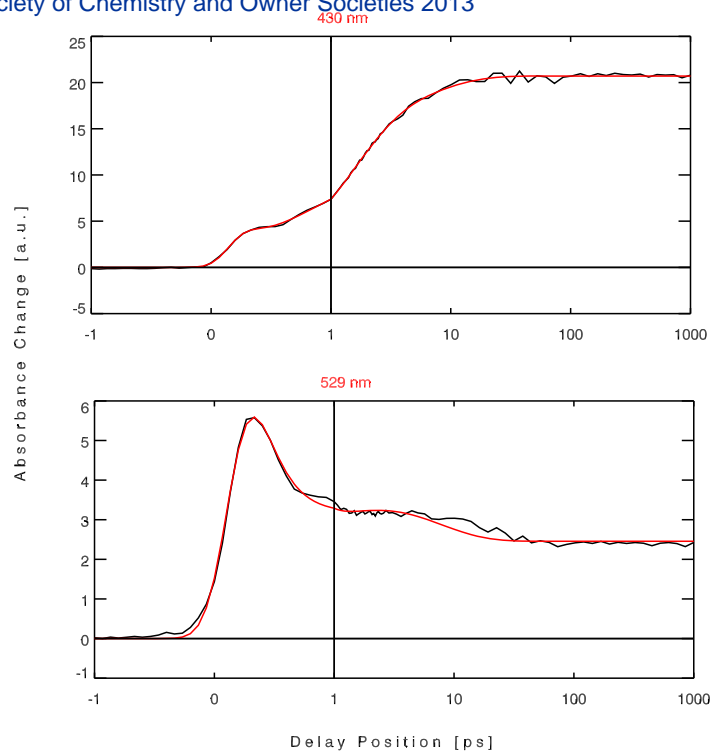

Supplement: c3pp50020a_2.pdf [file c3pp50020a_2.pdf]

DPBC in hexane  $\lambda_{exc} = 266 \text{ nm}$

DPBC in dodecane  $\lambda_{exc} = 266 \text{ nm}$

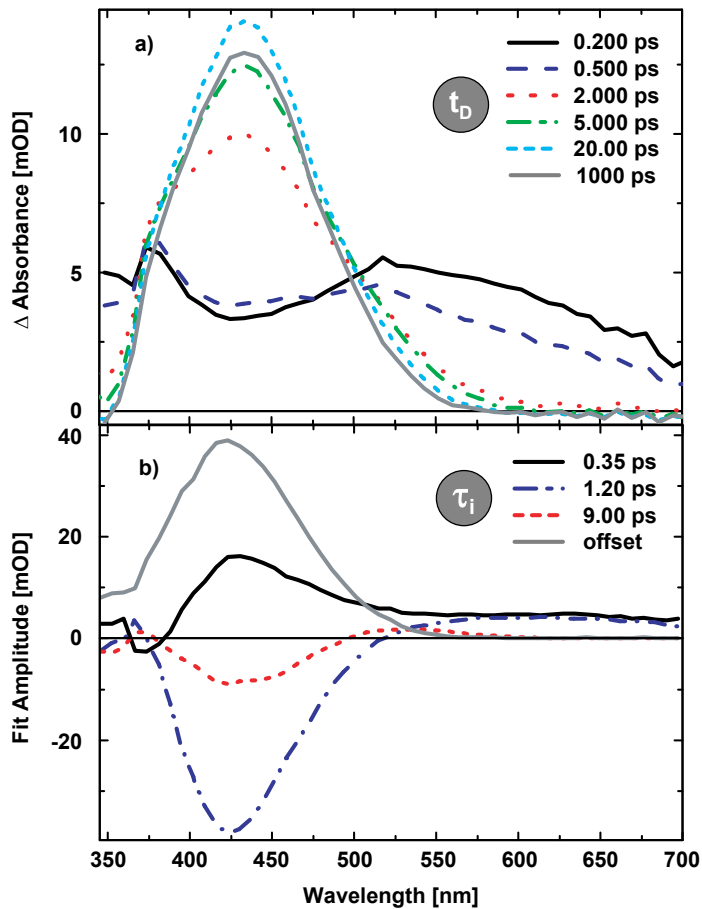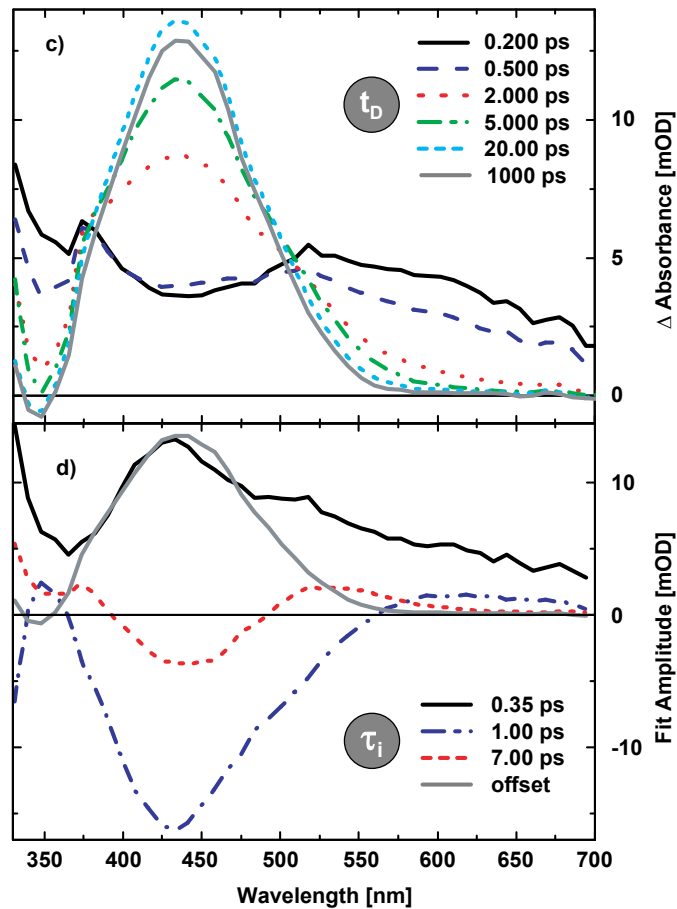

Supplement: c3pp50020a_3.pdf [file c3pp50020a_3.pdf]
